# Supplementary material for: Metabolic profiles by 1H-magnetic resonance spectroscopy in natalizumab-associated post-PML lesions of multiple sclerosis patients who survived progressive multifocal leukoencephalopathy (PML)
Source: PubMed Central journal article supplement (PMC5405920; doi:10.1371/journal.pone.0176415), 2017-04-26
Supplement: pone.0176415.s002.pdf [file pone.0176415.s002.pdf]

| patient nr | age at MRS (years) | male / female | MS subtype | PML disease duration                 |                 | PML group   | natalizumab infusions | JCV load (CSF at PML diagnosis) | JCV load (CSF at MRS) | DMT at MRS         | PML lesion extension score* (0 - 9; on FLAIR images at time of MRS) | EDSS at 1year before |     | EDSS 6-12 months after |     | KPS 6-12 months after |            | NAA/Cr               |      | NAA/Cho |      | Cho/Cr |      | Lip /Cr |      |      |      |      |      |      |      |
|------------|--------------------|---------------|------------|--------------------------------------|-----------------|-------------|-----------------------|---------------------------------|-----------------------|--------------------|---------------------------------------------------------------------|----------------------|-----|------------------------|-----|-----------------------|------------|----------------------|------|---------|------|--------|------|---------|------|------|------|------|------|------|------|
|            |                    |               |            | between MS diagnosis and PML (years) | at MRS (months) |             |                       |                                 |                       |                    |                                                                     | EDSS at MRS          | PML | EDSS at PML diagnosis  | PML | KPS at MRS            | before PML | KPS at PML diagnosis | PML  | MS      | PML  | MS     | PML  | MS      | PML  | MS   |      |      |      |      |      |
| 1          | 62                 | m             | RRMS       | 19                                   | 8               | E-pPML      | 96                    | 5                               | no                    | 4                  | 5.5                                                                 | 2                    | 4   | 5.5                    | 50  | 90                    | 80         | 50                   | 1.07 | 1.34    | 0.85 | 1.30   | 1.26 | 1.03    | 0.60 | 0.28 |      |      |      |      |      |
| 2          | 43                 | m             | RRMS       | 23                                   | 11              | E-pPML      | 55                    | 150                             | no                    | 6                  | 6.5                                                                 | 2                    | 4   | 6                      | 50  | 70                    | 50         | 50                   | 1.22 | 1.37    | 1.52 | 1.71   | 0.80 | 0.80    | 1.48 | 0.45 |      |      |      |      |      |
| 3          | 21                 | f             | RRMS       | 4                                    | 12              | E-pPML      | 22                    | 18                              | corticosteroids       | 6                  | 2.5                                                                 | 2                    | 2.5 | 2.5                    | 90  | 90                    | 90         | 80                   | 1.74 | 1.70    | 1.40 | 2.51   | 2.13 | 1.73    | 0.70 | 0.80 | 0.81 | 0.80 | 0.61 | 0.55 |      |
| 4          | 28                 | f             | RRMS       | 6                                    | 19              | E-pPML      | 49                    | 52                              | dimethyl fumarate     | 4                  | 3.5                                                                 | 2                    | 2   | 3.5                    | 70  | 100                   | 60         | 70                   | 0.88 | 1.63    | 1.58 | 1.08   | 2.65 | 2.36    | 0.81 | 0.61 | 0.67 | 1.78 | 0.40 | 0.70 |      |
| 5          | 36                 | m             | RRMS       | 8                                    | 19              | E-pPML      | 48                    | 0                               | interferon beta       | 1                  | 1.5                                                                 | 1.5                  | 1.5 | 1.5                    | 100 | 100                   | 100        | 100                  | 1.02 | 1.35    | 2.13 | 1.55   | 1.56 | 1.60    | 0.66 | 0.87 | 1.33 | 1.15 | 0.57 | 1.65 |      |
| 6          | 40                 | m             | RRMS       | 6                                    | 23              | L-pPML      | 48                    | 5                               | fingolimod            | 4                  | 4                                                                   | 2                    | 3   | 3                      | 70  | 80                    | 60         | 70                   | 1.27 | 1.76    |      | 1.52   | 2.15 |         | 0.84 | 0.82 |      | 0.72 | 1.06 |      |      |
| 7          | 43                 | m             | RRMS       | 9                                    | 26              | L-pPML JCV+ | 51                    | 444                             | 54                    | no                 | 8                                                                   | 5.5                  | 3.5 | 4                      | 4   | 60                    | 80         | 70                   | 60   | 1.00    | 1.21 |        | 0.90 | 1.77    |      | 1.12 | 0.68 |      | 0.27 | 0.35 |      |
| 8          | 38                 | f             | RRMS       | 16                                   | 27              | L-pPML      | 49                    | 27                              | interferon beta       | 7                  | 4                                                                   | 2.5                  | 3   | 3                      | 80  | 90                    | 60         | 70                   | 1.08 | 1.67    | 1.21 | 1.06   | 1.82 | 1.02    | 1.02 | 0.92 | 1.18 | 0.91 | 0.51 | 0.48 |      |
| 9          | 35                 | f             | RRMS       | 11                                   | 29              | L-pPML JCV+ | 62                    | 1390                            | 27                    | iv. immunoglobulin | 4                                                                   | 7.5                  | 1   | 6                      | 7   | 50                    | 100        | 70                   | 50   | 1.05    |      |        | 0.87 |         |      | 1.21 |      |      | 0.28 |      |      |
| 10         | 47                 | f             | RRMS       |                                      | 38              | L-pPML      | 72                    | 202                             | no                    | 3                  | 4                                                                   | 2.5                  | 3.5 | 2                      | 80  | 90                    | 70         | 80                   | 1.44 | 1.62    |      | 1.68   | 3.23 |         | 0.85 | 0.50 |      | 0.14 | 0.42 |      |      |
| 11         | 50                 | f             | RRMS       | 15                                   | 38              | L-pPML      | 40                    | 6000                            | no                    | 6                  | 5                                                                   | 2                    | 2   | 4                      | 80  | 100                   | 70         | 80                   | 1.42 | 1.27    |      | 1.82   | 2.84 |         | 0.78 | 0.45 |      | 0.12 | 0.45 |      |      |
| 12         | 38                 | f             | RRMS       | 5                                    | 45              | L-pPML      | 26                    | 37                              | interferon beta       | 9                  | 6.5                                                                 | 2                    | 2   | 6                      | 80  | 100                   | 70         | 60                   | 1.29 | 1.55    |      | 1.97   | 2.61 |         | 0.65 | 0.59 |      | 0.52 | 0.46 |      |      |
| 13         | 35                 | f             | RRMS       | 9                                    | 51              | L-pPML JCV+ | 30                    | 7400                            | 240                   | no                 | 9                                                                   | 7                    | 1.5 | 3.5                    | 7   | 60                    | 90         | 90                   | 50   | 0.92    | 1.88 | 1.91   | 1.09 | 2.59    | 2.45 | 0.85 | 0.73 | 0.78 | 0.22 | 0.75 | 0.97 |
| 14         | 41                 | f             | RRMS       | 4                                    | 56              | L-pPML JCV+ | 27                    | 42                              | 27                    | corticosteroids    | 6                                                                   | 5                    | 1.5 | 3.5                    | 5   | 60                    | 90         | 90                   | 60   | 1.29    | 1.39 |        | 1.49 | 1.35    |      | 0.86 | 1.04 |      | 0.44 | 0.41 |      |
| 15         | 37                 | m             | RRMS       | 12                                   | 67              | L-pPML      | 34                    | 237                             |                       | 5                  | 6.5                                                                 | 2                    | 5   | 6.5                    | 50  | 90                    | 40         | 50                   | 1.24 | 1.49    |      | 1.78   | 2.30 |         | 0.70 | 0.65 |      | 0.97 | 0.42 |      |      |

MRS=magnetic resonance spectroscopy

MS= multiple sclerosis

RRMS= relapsing-remitting MS

PML= progressive multifocal leukoencephalopathy

E-pPML= early post-PML (<= 19 months)

L-pPML= late post-PML (>= 23 months)

DMTs= disease modifying therapy

EDSS=expanded disability status scale

KPS= Karnofsky performance scale

NAAW= normal appearing white matter

NAA=N-acetyl aspartate

Cr=Creatine

Ch=Choline

Lip=lipid

\* PML lesion extension score (maximum 9), assessed on axial FLAIR images at time of MRS

PML lesion affected

1= single gyrus

2= two gyri

3= single lobe

4= multiple lobes

5= one hemisphere

6= multiple lobes in both hemispheres

7= one hemisphere and one contralateral lobe

8= one hemisphere and multiple contralateral lobes

9= both hemispheres
